# Supplementary material
Source: PubMed Central journal article supplement (PMC7818181)
Supplement: jamacardiol-e207073-s001.pdf [file jamacardiol-e207073-s001.pdf]

## Supplementary Online Content

Dugani SB, Moorthy MV, Li C, et al. Association of lipid, inflammatory, and metabolic biomarkers with age at onset for incident coronary heart disease in women. *JAMA Cardiol*. Published online January 20, 2021. doi:10.1001/jamacardio.2020.7073

**eMethods 1.** Development and Measurement of Selected Biomarkers

**eMethods 2.** Study Strata and Time Contribution to Age Groups

**eTable 1.** Standard Deviation of Baseline Levels From Entire Cohort (n = 28,024)

**eTable 2.** Association of Risk Factors With Incident CHD by Age of Onset and Blood Draw Time Categories

**eTable 3.** Association of Risk Factors and Biomarkers With Incident CHD After Additional Adjustment for Covariates

**eTable 4.** Population-Attributable Risk Analysis by Age of CHD Onset

**eTable 5.** Baseline Biomarker Levels for CHD cases (by Age of Onset) and Noncases

**eTable 6.** Characteristics of Participants in Each Age Group

**eTable 7.** Types of Incident CHD Events by Age of Onset

**eReferences**

This supplementary material has been provided by the authors to give readers additional information about their work.

## **eMethods 1: Development and measurement of selected biomarkers**

### **1. Lipoprotein subfractions**

Lipoprotein particle concentration and average size were determined using a deconvolution algorithm with nuclear magnetic resonance (NMR) spectroscopy, as described.<sup>1</sup> The following lipoprotein subfractions are described:

#### **A. Low-density lipoprotein (LDL) particles**

There are three LDL subclasses on the basis of estimated diameter:

Large LDL particles: 21.5nm–23nm

Medium LDL particles: 20.5nm–21.4nm

Small LDL particles: 19nm–20.4nm

#### **B. Triglyceride-rich lipoprotein (TRL) particles**

Large lipoprotein subfractions previously named very-low density lipoprotein (VLDL) particles or chylomicrons now refer to specific TRL particle subfractions to acknowledge that NMR spectroscopy distinguishes particles based on size and not on protein composition or metabolic origin.

There are five TRL subclasses on the basis of estimated diameter:

Very large TRL particles: 90nm–240nm

Large TRL particles: 50nm–89nm

Medium TRL particles: 37nm–49nm

Small TRL particles: 30nm–36nm

Very small TRL particles: 24nm–29nm

#### **C. High-density lipoprotein (HDL) particles**

There are three HDL subclasses on the basis of estimated diameter:

Large HDL particles: 10.3nm–13nm

Medium HDL particles: 8.7nm–10.2nm

Small HDL particles: 7.4nm–8.6nm

### **2. Total branched chain amino acids ( BCAAs)**

Isoleucine, leucine, and valine ( BCAAs) were measured by proton NMR spectroscopy. NMR spectra were deconvoluted with software containing reference spectra for BCAAs, serum proteins, and lipoproteins, as described.<sup>2</sup> Since levels of these amino acids are highly correlated, their sum (total BCAAs) is used for analytic purposes.

### **3. GlycA**

GlycA reflects the aggregated levels of glycosylated acute phase proteins. GlycA concentration is based on NMR signal amplitudes from N-acetyl methyl groups of N-acetylglucosamine moieties located on the bi-, tri-, and tetra-antennary branches of specific serum proteins (predominantly  $\alpha$ 1-acid glycoprotein, haptoglobin,  $\alpha$ 1-antitrypsin,  $\alpha$ 1-antichymotrypsin, and transferrin). GlycA levels are positively associated with risk of incident diabetes, cardiovascular disease, and mortality.<sup>3–7</sup>

### **4. Lipoprotein insulin resistance (LPIR) score**

LPIR score is a correlate of insulin resistance and is derived as a weighted combination of six lipoprotein measures (average TRL particle size, concentration of large TRL particles, average HDL particle size, concentration of large HDL particles, concentration of small LDL particles, and average LDL particle size).<sup>8,9</sup> Briefly, the weighting scores are based on the strength and independence of each lipoprotein measure with insulin resistance; average TRL particle size (score 32) and concentration of large TRL particles (score 22), average HDL particle size (score 20), concentration of large HDL particles (score 12), concentration of small LDL particles (score 8) and average LDL particle size (score 6).<sup>8,10</sup> LPIR score ranges from 0–100, where higher scores predict increased risk of insulin resistance and incident diabetes.<sup>8,9</sup>

## **eMethods 2: Study Strata and Time Contribution to Age Groups**

### **Study Strata**

We divided study time into four age groups (age <55, 55 ≤ age <65, 65 ≤ age <75, and age ≥75 years) and two blood draw time categories (≤10 years, >10 years), and formed seven strata. Since the minimum age for enrollment in WHS was 45 years there were no participants in the stratum based on age <55 and blood draw time >10 years. We used stratified Cox proportional hazards regression models with the counting process method, stratified by the seven strata.

Women could contribute exposure time to more than one age group as they passed through time until the occurrence of incident CHD or censoring (death or last follow-up), as illustrated below.

### **Time Contribution to Age Groups**

#### **Example 1**

The participant is 48 years old at time of enrollment, and experiences an incident CHD event at age 57 years.

She contributes 9 person-years to blood draw time category ≤10 years (and no time to blood draw time >10 years) as follows:

- age 48-55: 7 years to age <55 group
- age 55-57: 2 years to 55 ≤ age <65 group

#### **Example 2**

The participant is 58 years old at time of enrollment, and is censored at age 81 years.

She contributes 23 person-years as follows:

10 years to the ≤10 year blood draw time category:

- age 58-65: 7 years to 55 ≤ age <65 group
- age 65-68: 3 years to 65 ≤ age <75 group

13 years to the >10 year blood draw time category:

- age 68-75: 7 years to 65 ≤ age <75 group
- age 75-81: 6 years to age ≥75 group

**eTable 1: Standard deviation of baseline levels from entire cohort (n = 28,024)**

|                                                                          | Standard deviation |
|--------------------------------------------------------------------------|--------------------|
| Body mass index, kg/m <sup>2</sup>                                       | 5.0                |
| Systolic blood pressure, mm Hg                                           | 13.7               |
| Total cholesterol, mg/dL                                                 | 41.8               |
| LDL cholesterol, mg/dL                                                   | 34.2               |
| HDL cholesterol, mg/dL                                                   | 15.0               |
| Total/HDL cholesterol ratio                                              | 0.3                |
| Triglycerides, mg/dL                                                     | 0.5                |
| Trig/HDL cholesterol ratio                                               | 0.7                |
| Non-HDL cholesterol, mg/dL                                               | 41.2               |
| Apolipoprotein B, mg/dL                                                  | 27.9               |
| Apolipoprotein A-I, mg/dL                                                | 25.6               |
| Lipoprotein(a), mg/dL                                                    | 1.3                |
| Total LDL particles, nmol/L                                              | 397.1              |
| Large LDL particles                                                      | 222.5              |
| Medium LDL particles                                                     | 249.6              |
| Small LDL particles                                                      | 501.2              |
| LDL particle average size, nm                                            | 0.5                |
| Total TRL particles, nmol/L                                              | 61.4               |
| Very large TRL particles                                                 | 0.5                |
| Large TRL particles                                                      | 3.1                |
| Medium TRL particles                                                     | 1.4                |
| Small TRL particles                                                      | 1.2                |
| Very small TRL particles                                                 | 42.5               |
| TRL particle average size, nm                                            | 7.5                |
| TRL cholesterol, mg/dL                                                   | 11.1               |
| TRL triglycerides, mg/dL                                                 | 0.5                |
| Total HDL particles, μmol/L                                              | 3.8                |
| Large HDL particles                                                      | 0.7                |
| Medium HDL particles                                                     | 2.8                |
| Small HDL particles                                                      | 3.4                |
| HDL particle average size, nm                                            | 0.4                |
| CRP, mg/L                                                                | 1.2                |
| Fibrinogen, mg/dL                                                        | 79.4               |
| Intercellular adhesion molecule 1, ng/mL                                 | 83.0               |
| Glycan biomarker of N-acetyl side chains of acute-phase proteins, μmol/L | 68.5               |
| Hemoglobin A1c, %                                                        | 0.6                |
| LPIR score (0–100)                                                       | 1.2                |
| Homocysteine, μmol/L                                                     | 0.3                |
| Citrate, μmol/L                                                          | 28.3               |
| Total branched chain amino acids, μmol/L                                 | 92.1               |
| Valine, μmol/L                                                           | 46.8               |
| Leucine, μmol/L                                                          | 35.8               |
| Isoleucine, μmol/L                                                       | 20.9               |
| Alanine, μmol/L                                                          | 108.7              |
| Estimated glomerular filtration rate, mL/min per 1.73m <sup>2</sup>      | 26.6               |
| Creatinine, mg/dL                                                        | 0.2                |

The following were log transformed: CRP, homocysteine, large HDL particles, lipoprotein (a), LPIR score, medium TRL particles, small TRL particles, total/HDL cholesterol ratio, triglycerides, trig/HDL cholesterol ratio, and TRL triglycerides. Abbreviations: CRP, C-reactive protein; HDL, high-density lipoprotein; LDL, low-density lipoprotein; LPIR, lipoprotein insulin resistance; TRL, triglyceride-rich lipoprotein.

**eTable 2: Association of risk factors with incident CHD by age of onset and blood draw time categories**

| Risk factor                    | Incident CHD at age <55                         | Incident CHD at 55≤ age <65 | Incident CHD at 65≤ age <75 | Incident CHD at age ≥75 | <i>P</i> <sub>interaction</sub> <sup>a</sup><br>(risk factor) ×<br>(blood draw time category) |
|--------------------------------|-------------------------------------------------|-----------------------------|-----------------------------|-------------------------|-----------------------------------------------------------------------------------------------|
| <b>Clinical risk factors</b>   | Adjusted hazard ratio (95% CI)                  |                             |                             |                         |                                                                                               |
| BMI, per SD increment          |                                                 |                             |                             |                         |                                                                                               |
| Blood draw ≤10 years           | 1.47 (1.24 – 1.74)                              | 1.39 (1.26 – 1.54)          | 1.35 (1.20 – 1.52)          | 1.06 (0.81 – 1.39)      | .96                                                                                           |
| Blood draw >10 years           | censored <sup>b</sup>                           | 1.41 (1.25 – 1.59)          | 1.32 (1.22 – 1.43)          | 1.13 (1.01 – 1.26)      |                                                                                               |
| BMI categories                 |                                                 |                             |                             |                         |                                                                                               |
| Overweight                     |                                                 |                             |                             |                         |                                                                                               |
| Blood draw ≤10 years           | 2.13 (1.10 – 4.14)                              | 1.84 (1.36 – 2.50)          | 1.58 (1.17 – 2.13)          | 1.00 (0.61 – 1.67)      | .71                                                                                           |
| Blood draw >10 years           | censored                                        | 1.65 (1.08 – 2.52)          | 1.91 (1.52 – 2.40)          | 1.15 (0.91 – 1.45)      |                                                                                               |
| Obese                          |                                                 |                             |                             |                         |                                                                                               |
| Blood draw ≤10 years           | 4.33 (2.31 – 8.11)                              | 2.51 (1.82 – 3.46)          | 2.06 (1.46 – 2.90)          | 1.06 (0.51 – 2.18)      | .69                                                                                           |
| Blood draw >10 years           | censored                                        | 3.24 (2.16 – 4.86)          | 2.18 (1.69 – 2.81)          | 1.37 (1.03 – 1.81)      |                                                                                               |
| Current smoker                 |                                                 |                             |                             |                         |                                                                                               |
| Blood draw ≤10 years           | 3.92 (2.32 – 6.63)                              | 3.01 (2.28 – 3.98)          | 1.98 (1.41 – 2.76)          | 1.75 (0.84 – 3.67)      | .98                                                                                           |
| Blood draw >10 years           | censored                                        | 2.89 (1.98 – 4.22)          | 1.84 (1.42 – 2.38)          | 1.92 (1.41 – 2.61)      |                                                                                               |
| Diabetes                       |                                                 |                             |                             |                         |                                                                                               |
| Blood draw ≤10 years           | 10.71 (5.57 – 20.60)                            | 10.67 (7.84 – 14.53)        | 3.93 (2.70 – 5.72)          | 4.41 (2.18 – 8.91)      | .65                                                                                           |
| Blood draw >10 years           | censored                                        | 11.52 (7.23 – 18.37)        | 5.14 (3.60 – 7.35)          | 3.26 (2.21 – 4.79)      |                                                                                               |
| Metabolic syndrome             |                                                 |                             |                             |                         |                                                                                               |
| Blood draw ≤10 years           | 6.09 (3.60 – 10.29)                             | 4.10 (3.17 – 5.31)          | 2.74 (2.11 – 3.56)          | 1.50 (0.93 – 2.41)      | .62                                                                                           |
| Blood draw >10 years           | censored                                        | 5.13 (3.64 – 7.22)          | 2.86 (2.35 – 3.49)          | 1.85 (1.50 – 2.29)      |                                                                                               |
| Hypertension                   |                                                 |                             |                             |                         |                                                                                               |
| Blood draw ≤10 years           | 4.58 (2.76 – 7.60)                              | 2.25 (1.74 – 2.91)          | 1.87 (1.44 – 2.43)          | 2.00 (1.24 – 3.21)      | .51                                                                                           |
| Blood draw >10 years           | censored                                        | 2.67 (1.87 – 3.81)          | 2.19 (1.79 – 2.69)          | 1.58 (1.28 – 1.94)      |                                                                                               |
| Systolic BP, per SD increment  |                                                 |                             |                             |                         |                                                                                               |
| Blood draw ≤10 years           | 2.24 (1.84 – 2.74)                              | 1.61 (1.44 – 1.80)          | 1.48 (1.32 – 1.66)          | 1.38 (1.11 – 1.71)      | .84                                                                                           |
| Blood draw >10 years           | censored                                        | 1.62 (1.39 – 1.89)          | 1.48 (1.35 – 1.62)          | 1.23 (1.12 – 1.36)      |                                                                                               |
| Physical inactivity            |                                                 |                             |                             |                         |                                                                                               |
| Blood draw ≤10 years           | 1.53 (0.92 – 2.55)                              | 1.64 (1.27 – 2.12)          | 1.65 (1.27 – 2.14)          | 1.54 (0.97 – 2.44)      | .35                                                                                           |
| Blood draw >10 years           | censored                                        | 1.51 (1.07 – 2.13)          | 1.31 (1.08 – 1.60)          | 1.15 (0.94 – 1.42)      |                                                                                               |
| Parental MI <60 years          |                                                 |                             |                             |                         |                                                                                               |
| Blood draw ≤10 years           | 2.19 (1.26 – 3.81)                              | 2.29 (1.72 – 3.05)          | 1.41 (0.97 – 2.03)          | 0.65 (0.24 – 1.79)      | .28                                                                                           |
| Blood draw >10 years           | censored                                        | 1.73 (1.17 – 2.57)          | 1.70 (1.33 – 2.16)          | 1.27 (0.94 – 1.71)      |                                                                                               |
| <b>Lipids and lipoproteins</b> | Adjusted hazard ratio (95% CI) per SD increment |                             |                             |                         |                                                                                               |
| Total cholesterol              |                                                 |                             |                             |                         |                                                                                               |
| Blood draw ≤10 years           | 1.39 (1.12 – 1.73)                              | 1.35 (1.20 – 1.51)          | 1.18 (1.05 – 1.33)          | 1.18 (0.96 – 1.45)      | .22                                                                                           |
| Blood draw >10 years           | censored                                        | 1.58 (1.38 – 1.80)          | 1.28 (1.17 – 1.40)          | 1.10 (1.00 – 1.22)      |                                                                                               |
| LDL cholesterol                |                                                 |                             |                             |                         |                                                                                               |
| Blood draw ≤10 years           | 1.38 (1.10 – 1.74)                              | 1.35 (1.20 – 1.51)          | 1.18 (1.05 – 1.34)          | 1.05 (0.84 – 1.31)      | .19                                                                                           |
| Blood draw >10 years           | censored                                        | 1.60 (1.39 – 1.84)          | 1.28 (1.17 – 1.41)          | 1.13 (1.03 – 1.25)      |                                                                                               |
| HDL cholesterol                |                                                 |                             |                             |                         |                                                                                               |
| Blood draw ≤10 years           | 0.39 (0.27 – 0.55)                              | 0.51 (0.43 – 0.59)          | 0.56 (0.48 – 0.66)          | 0.97 (0.77 – 1.23)      | .10                                                                                           |
| Blood draw >10 years           | censored                                        | 0.47 (0.38 – 0.59)          | 0.64 (0.57 – 0.72)          | 0.74 (0.66 – 0.83)      |                                                                                               |
| Total/HDL cholesterol ratio    |                                                 |                             |                             |                         |                                                                                               |

|                                        |                    |                    |                    |                    |     |
|----------------------------------------|--------------------|--------------------|--------------------|--------------------|-----|
| Blood draw ≤10 years                   | 2.40 (1.90 – 3.05) | 2.09 (1.85 – 2.36) | 1.81 (1.59 – 2.06) | 1.21 (0.95 – 1.53) | .25 |
| Blood draw >10 years                   | censored           | 2.43 (2.07 – 2.85) | 1.74 (1.58 – 1.92) | 1.45 (1.30 – 1.61) |     |
| Triglycerides                          |                    |                    |                    |                    |     |
| Blood draw ≤10 years                   | 2.14 (1.72 – 2.67) | 1.70 (1.51 – 1.92) | 1.69 (1.49 – 1.92) | 1.37 (1.07 – 1.75) | .34 |
| Blood draw >10 years                   | censored           | 1.96 (1.69 – 2.27) | 1.57 (1.42 – 1.72) | 1.28 (1.15 – 1.43) |     |
| Trig/HDL cholesterol ratio             |                    |                    |                    |                    |     |
| Blood draw ≤10 years                   | 2.27 (1.83 – 2.81) | 1.84 (1.64 – 2.07) | 1.78 (1.57 – 2.02) | 1.28 (1.00 – 1.63) | .45 |
| Blood draw >10 years                   | censored           | 2.05 (1.77 – 2.37) | 1.64 (1.49 – 1.79) | 1.36 (1.22 – 1.50) |     |
| Non-HDL cholesterol                    |                    |                    |                    |                    |     |
| Blood draw ≤10 years                   | 1.67 (1.36 – 2.04) | 1.57 (1.41 – 1.74) | 1.36 (1.22 – 1.53) | 1.19 (0.97 – 1.46) | .26 |
| Blood draw >10 years                   | censored           | 1.83 (1.62 – 2.08) | 1.44 (1.32 – 1.58) | 1.21 (1.10 – 1.33) |     |
| Apolipoprotein B                       |                    |                    |                    |                    |     |
| Blood draw ≤10 years                   | 1.89 (1.52 – 2.35) | 1.67 (1.51 – 1.84) | 1.51 (1.35 – 1.69) | 1.16 (0.92 – 1.47) | .10 |
| Blood draw >10 years                   | censored           | 2.04 (1.79 – 2.33) | 1.52 (1.40 – 1.66) | 1.28 (1.16 – 1.41) |     |
| Apolipoprotein A-I                     |                    |                    |                    |                    |     |
| Blood draw ≤10 years                   | 0.69 (0.51 – 0.94) | 0.60 (0.52 – 0.69) | 0.72 (0.63 – 0.83) | 1.05 (0.83 – 1.32) | .31 |
| Blood draw >10 years                   | censored           | 0.63 (0.52 – 0.77) | 0.78 (0.70 – 0.86) | 0.85 (0.76 – 0.94) |     |
| Lipoprotein (a)                        |                    |                    |                    |                    |     |
| Blood draw ≤10 years                   | 1.22 (0.92 – 1.62) | 1.23 (1.08 – 1.41) | 0.98 (0.86 – 1.12) | 1.05 (0.83 – 1.33) | .09 |
| Blood draw >10 years                   | censored           | 1.35 (1.13 – 1.62) | 1.20 (1.08 – 1.33) | 1.11 (1.00 – 1.23) |     |
| Total LDL particles <sup>c</sup>       |                    |                    |                    |                    |     |
| Blood draw ≤10 years                   | 1.75 (1.42 – 2.15) | 1.52 (1.36 – 1.71) | 1.36 (1.21 – 1.54) | 1.34 (1.06 – 1.68) | .59 |
| Blood draw >10 years                   | censored           | 1.70 (1.48 – 1.95) | 1.37 (1.25 – 1.50) | 1.22 (1.10 – 1.35) |     |
| Large LDL particles <sup>d</sup>       |                    |                    |                    |                    |     |
| Blood draw ≤10 years                   | 1.02 (0.74 – 1.42) | 1.11 (0.95 – 1.28) | 1.08 (0.93 – 1.25) | 1.29 (1.00 – 1.66) | .12 |
| Blood draw >10 years                   | censored           | 0.88 (0.69 – 1.11) | 0.97 (0.86 – 1.09) | 1.07 (0.95 – 1.20) |     |
| Medium LDL particles <sup>d</sup>      |                    |                    |                    |                    |     |
| Blood draw ≤10 years                   | 1.13 (0.80 – 1.60) | 1.08 (0.91 – 1.27) | 1.09 (0.93 – 1.27) | 0.93 (0.69 – 1.26) | .49 |
| Blood draw >10 years                   | censored           | 1.31 (1.08 – 1.59) | 1.08 (0.95 – 1.22) | 1.00 (0.88 – 1.13) |     |
| Small LDL particles <sup>d</sup>       |                    |                    |                    |                    |     |
| Blood draw ≤10 years                   | 2.25 (1.76 – 2.89) | 1.80 (1.57 – 2.07) | 1.57 (1.35 – 1.82) | 1.48 (1.12 – 1.95) | .45 |
| Blood draw >10 years                   | censored           | 2.14 (1.80 – 2.55) | 1.57 (1.40 – 1.76) | 1.35 (1.19 – 1.53) |     |
| LDL particle average size <sup>c</sup> |                    |                    |                    |                    |     |
| Blood draw ≤10 years                   | 0.64 (0.50 – 0.80) | 0.79 (0.70 – 0.89) | 0.82 (0.72 – 0.92) | 1.00 (0.79 – 1.26) | .23 |
| Blood draw >10 years                   | censored           | 0.67 (0.57 – 0.78) | 0.79 (0.72 – 0.87) | 0.87 (0.78 – 0.96) |     |
| Total TRL particles                    |                    |                    |                    |                    |     |
| Blood draw ≤10 years                   | 1.74 (1.44 – 2.10) | 1.44 (1.28 – 1.61) | 1.38 (1.23 – 1.55) | 1.22 (0.98 – 1.53) | .14 |
| Blood draw >10 years                   | censored           | 1.79 (1.55 – 2.06) | 1.38 (1.26 – 1.51) | 1.24 (1.13 – 1.37) |     |
| Very large TRL particles               |                    |                    |                    |                    |     |
| Blood draw ≤10 years                   | 1.27 (1.16 – 1.40) | 1.14 (1.06 – 1.23) | 1.21 (1.14 – 1.28) | 1.10 (0.92 – 1.32) | .52 |
| Blood draw >10 years                   | censored           | 1.20 (1.10 – 1.32) | 1.15 (1.08 – 1.22) | 1.11 (1.03 – 1.20) |     |
| Large TRL particles                    |                    |                    |                    |                    |     |
| Blood draw ≤10 years                   | 1.66 (1.43 – 1.93) | 1.30 (1.17 – 1.44) | 1.34 (1.21 – 1.49) | 1.32 (1.08 – 1.62) | .12 |
| Blood draw >10 years                   | censored           | 1.55 (1.38 – 1.74) | 1.34 (1.24 – 1.45) | 1.18 (1.07 – 1.29) |     |
| Medium TRL particles                   |                    |                    |                    |                    |     |
| Blood draw ≤10 years                   | 1.80 (1.14 – 2.84) | 1.44 (1.15 – 1.79) | 1.90 (1.47 – 2.46) | 1.24 (0.85 – 1.80) | .05 |
| Blood draw >10 years                   | censored           | 2.08 (1.51 – 2.85) | 1.38 (1.17 – 1.62) | 1.22 (1.04 – 1.44) |     |
| Small TRL particles                    |                    |                    |                    |                    |     |
| Blood draw ≤10 years                   | 0.84 (0.73 – 0.96) | 1.04 (0.90 – 1.20) | 0.92 (0.83 – 1.02) | 1.09 (0.76 – 1.55) | .12 |
| Blood draw >10 years                   | censored           | 0.91 (0.80 – 1.05) | 1.10 (0.96 – 1.25) | 1.16 (0.99 – 1.36) |     |
| Very small TRL particles               |                    |                    |                    |                    |     |
| Blood draw ≤10 years                   | 1.77 (1.43 – 2.18) | 1.40 (1.25 – 1.57) | 1.37 (1.22 – 1.53) | 1.21 (0.96 – 1.51) | .07 |
| Blood draw >10 years                   | censored           | 1.78 (1.55 – 2.06) | 1.32 (1.20 – 1.45) | 1.19 (1.08 – 1.31) |     |
| TRL cholesterol                        |                    |                    |                    |                    |     |
| Blood draw ≤10 years                   | 1.66 (1.35 – 2.02) | 1.23 (1.10 – 1.38) | 1.36 (1.21 – 1.52) | 1.21 (0.96 – 1.53) | .22 |

|                           |                                                 |                    |                    |                    |      |
|---------------------------|-------------------------------------------------|--------------------|--------------------|--------------------|------|
| Blood draw >10 years      | censored                                        | 1.48 (1.28 – 1.70) | 1.29 (1.18 – 1.41) | 1.13 (1.02 – 1.26) |      |
| TRL triglycerides         |                                                 |                    |                    |                    |      |
| Blood draw ≤10 years      | 1.77 (1.47 – 2.12)                              | 1.43 (1.27 – 1.60) | 1.40 (1.25 – 1.56) | 1.25 (1.00 – 1.56) | .14  |
| Blood draw >10 years      | censored                                        | 1.77 (1.54 – 2.02) | 1.39 (1.27 – 1.52) | 1.24 (1.13 – 1.37) |      |
| TRL particle average size |                                                 |                    |                    |                    |      |
| Blood draw ≤10 years      | 2.21 (1.68 – 2.90)                              | 1.47 (1.28 – 1.68) | 1.62 (1.40 – 1.88) | 1.28 (0.99 – 1.66) | .05  |
| Blood draw >10 years      | censored                                        | 1.99 (1.66 – 2.38) | 1.49 (1.34 – 1.65) | 1.27 (1.13 – 1.42) |      |
| Total HDL particles       |                                                 |                    |                    |                    |      |
| Blood draw ≤10 years      | 0.96 (0.73 – 1.27)                              | 0.74 (0.65 – 0.85) | 0.93 (0.81 – 1.06) | 1.12 (0.89 – 1.42) | .06  |
| Blood draw >10 years      | censored                                        | 0.95 (0.79 – 1.14) | 0.88 (0.80 – 0.98) | 0.90 (0.81 – 1.00) |      |
| Large HDL particles       |                                                 |                    |                    |                    |      |
| Blood draw ≤10 years      | 0.74 (0.65 – 0.85)                              | 0.76 (0.71 – 0.81) | 0.81 (0.75 – 0.87) | 1.11 (0.85 – 1.44) | .37  |
| Blood draw >10 years      | censored                                        | 0.74 (0.68 – 0.81) | 0.79 (0.74 – 0.85) | 0.89 (0.81 – 0.96) |      |
| Medium HDL particles      |                                                 |                    |                    |                    |      |
| Blood draw ≤10 years      | 0.65 (0.47 – 0.90)                              | 0.58 (0.50 – 0.68) | 0.74 (0.63 – 0.86) | 0.93 (0.72 – 1.21) | .46  |
| Blood draw >10 years      | censored                                        | 0.47 (0.37 – 0.60) | 0.71 (0.64 – 0.80) | 0.84 (0.75 – 0.94) |      |
| Small HDL particles       |                                                 |                    |                    |                    |      |
| Blood draw ≤10 years      | 1.60 (1.24 – 2.08)                              | 1.25 (1.10 – 1.42) | 1.32 (1.16 – 1.51) | 1.16 (0.91 – 1.47) | .009 |
| Blood draw >10 years      | censored                                        | 1.80 (1.52 – 2.14) | 1.28 (1.16 – 1.41) | 1.07 (0.97 – 1.19) |      |
| HDL particle average size |                                                 |                    |                    |                    |      |
| Blood draw ≤10 years      | 0.50 (0.37 – 0.69)                              | 0.57 (0.49 – 0.67) | 0.64 (0.55 – 0.75) | 1.03 (0.82 – 1.29) | .31  |
| Blood draw >10 years      | censored                                        | 0.48 (0.39 – 0.60) | 0.66 (0.59 – 0.74) | 0.86 (0.77 – 0.96) |      |
| <b>Inflammatory</b>       | Adjusted hazard ratio (95% CI) per SD increment |                    |                    |                    |      |
| CRP                       |                                                 |                    |                    |                    |      |
| Blood draw ≤10 years      | 1.76 (1.37 – 2.27)                              | 1.54 (1.34 – 1.76) | 1.62 (1.40 – 1.88) | 1.46 (1.12 – 1.90) | .14  |
| Blood draw >10 years      | censored                                        | 1.91 (1.61 – 2.27) | 1.63 (1.46 – 1.80) | 1.21 (1.08 – 1.36) |      |
| Fibrinogen                |                                                 |                    |                    |                    |      |
| Blood draw ≤10 years      | 1.49 (1.22 – 1.81)                              | 1.42 (1.29 – 1.56) | 1.28 (1.15 – 1.41) | 1.26 (1.03 – 1.54) | .21  |
| Blood draw >10 years      | censored                                        | 1.64 (1.48 – 1.82) | 1.29 (1.19 – 1.41) | 1.17 (1.06 – 1.28) |      |
| ICAM-1                    |                                                 |                    |                    |                    |      |
| Blood draw ≤10 years      | 1.52 (1.26 – 1.82)                              | 1.42 (1.31 – 1.55) | 1.38 (1.23 – 1.54) | 1.03 (0.80 – 1.33) | .15  |
| Blood draw >10 years      | censored                                        | 1.62 (1.45 – 1.82) | 1.31 (1.20 – 1.42) | 1.23 (1.11 – 1.36) |      |
| GlycA                     |                                                 |                    |                    |                    |      |
| Blood draw ≤10 years      | 1.84 (1.49 – 2.27)                              | 1.47 (1.30 – 1.66) | 1.50 (1.32 – 1.70) | 1.29 (1.02 – 1.62) | .09  |
| Blood draw >10 years      | censored                                        | 1.86 (1.61 – 2.15) | 1.45 (1.32 – 1.59) | 1.16 (1.04 – 1.30) |      |
| <b>Metabolic</b>          | Adjusted hazard ratio (95% CI) per SD increment |                    |                    |                    |      |
| Hemoglobin A1c            |                                                 |                    |                    |                    |      |
| Blood draw ≤10 years      | 1.38 (1.26 – 1.50)                              | 1.30 (1.25 – 1.35) | 1.21 (1.14 – 1.28) | 1.14 (0.96 – 1.35) | .11  |
| Blood draw >10 years      | censored                                        | 1.41 (1.33 – 1.50) | 1.26 (1.21 – 1.32) | 1.14 (1.06 – 1.22) |      |
| LPIR score                |                                                 |                    |                    |                    |      |
| Blood draw ≤10 years      | 6.40 (3.14 – 13.06)                             | 2.25 (1.70 – 2.98) | 2.76 (2.00 – 3.80) | 0.90 (0.77 – 1.05) | .002 |
| Blood draw >10 years      | censored                                        | 3.37 (2.28 – 4.97) | 1.86 (1.53 – 2.27) | 1.32 (1.11 – 1.59) |      |
| Homocysteine              |                                                 |                    |                    |                    |      |
| Blood draw ≤10 years      | 1.03 (0.79 – 1.35)                              | 1.23 (1.09 – 1.38) | 1.07 (0.93 – 1.23) | 0.86 (0.67 – 1.11) | .27  |
| Blood draw >10 years      | censored                                        | 1.19 (1.01 – 1.39) | 1.15 (1.05 – 1.27) | 1.09 (0.98 – 1.21) |      |
| Citrate                   |                                                 |                    |                    |                    |      |
| Blood draw ≤10 years      | 0.97 (0.73 – 1.29)                              | 1.03 (0.91 – 1.16) | 0.91 (0.79 – 1.05) | 1.12 (0.92 – 1.35) | .16  |
| Blood draw >10 years      | censored                                        | 1.09 (0.93 – 1.27) | 1.06 (0.97 – 1.16) | 0.95 (0.86 – 1.06) |      |
| Total BCAAs               |                                                 |                    |                    |                    |      |
| Blood draw ≤10 years      | 1.47 (1.20 – 1.80)                              | 1.29 (1.15 – 1.44) | 1.29 (1.15 – 1.45) | 1.19 (0.95 – 1.49) | .06  |
| Blood draw >10 years      | censored                                        | 1.62 (1.43 – 1.84) | 1.32 (1.21 – 1.43) | 1.10 (0.99 – 1.23) |      |
| Valine                    |                                                 |                    |                    |                    |      |
| Blood draw ≤10 years      | 1.51 (1.22 – 1.87)                              | 1.27 (1.13 – 1.42) | 1.30 (1.15 – 1.47) | 1.27 (1.01 – 1.59) | .01  |
| Blood draw >10 years      | censored                                        | 1.68 (1.46 – 1.92) | 1.31 (1.19 – 1.43) | 1.08 (0.97 – 1.20) |      |
| Leucine                   |                                                 |                    |                    |                    |      |

|                      |                    |                    |                    |                    |     |
|----------------------|--------------------|--------------------|--------------------|--------------------|-----|
| Blood draw ≤10 years | 1.30 (1.03 – 1.64) | 1.23 (1.09 – 1.39) | 1.16 (1.02 – 1.32) | 1.07 (0.85 – 1.35) | .12 |
| Blood draw >10 years | censored           | 1.53 (1.32 – 1.76) | 1.25 (1.14 – 1.38) | 1.05 (0.94 – 1.17) |     |
| Isoleucine           |                    |                    |                    |                    |     |
| Blood draw ≤10 years | 1.50 (1.23 – 1.83) | 1.30 (1.16 – 1.45) | 1.33 (1.19 – 1.49) | 1.12 (0.89 – 1.42) | .37 |
| Blood draw >10 years | censored           | 1.51 (1.32 – 1.72) | 1.32 (1.21 – 1.43) | 1.19 (1.08 – 1.32) |     |
| Alanine              |                    |                    |                    |                    |     |
| Blood draw ≤10 years | 1.10 (0.85 – 1.41) | 1.14 (1.00 – 1.29) | 1.27 (1.12 – 1.44) | 0.96 (0.76 – 1.23) | .39 |
| Blood draw >10 years | censored           | 1.25 (1.07 – 1.46) | 1.13 (1.02 – 1.24) | 1.00 (0.89 – 1.11) |     |
| eGFR                 |                    |                    |                    |                    |     |
| Blood draw ≤10 years | 1.27 (1.12 – 1.43) | 1.03 (0.91 – 1.16) | 0.99 (0.87 – 1.13) | 0.92 (0.70 – 1.20) | .40 |
| Blood draw >10 years | censored           | 0.91 (0.75 – 1.10) | 0.93 (0.84 – 1.04) | 1.07 (0.99 – 1.17) |     |
| Creatinine           |                    |                    |                    |                    |     |
| Blood draw ≤10 years | 0.55 (0.41 – 0.74) | 0.96 (0.85 – 1.10) | 1.05 (0.93 – 1.18) | 1.08 (0.89 – 1.31) | .44 |
| Blood draw >10 years | censored           | 1.03 (0.86 – 1.22) | 1.08 (0.98 – 1.19) | 0.92 (0.83 – 1.01) |     |

HRs (95% CI) obtained from stratified Cox models (stratified on age groups and blood draw time categories) adjusted for model 1 covariates (baseline race, education categories, menopause, postmenopausal hormone use, randomized treatment assignment, and interactions between the risk factor of interest and the seven age group × blood draw time categories).

<sup>a</sup>Likelihood Ratio Test (LRT, 3 d.f.) of the null hypothesis that the risk factor has the same effect across blood draw time categories; i.e., the models in Table 2 fit adequately.

<sup>b</sup>Two participants with incident CHD at age <55 and blood draw >10 years were censored after 10 years of study entry. These participants contributed exposure time to the 'age<55 and blood draw ≤10 years' stratum.

<sup>c</sup>included model 1 covariates plus LDL particle concentration and LDL particle average size.

<sup>d</sup>included model 1 covariates plus other LDL subclasses (large, medium, or small LDL particles).

The following were log transformed: CRP, homocysteine, large HDL particles, lipoprotein (a), LPIR score, medium TRL particles, small TRL particles, total/HDL cholesterol ratio, triglycerides, trig/HDL cholesterol ratio, and TRL triglycerides.

BMI (kg/m<sup>2</sup>) categories: 25.0 - <30 (overweight); ≥30.0 (obese).

Physical inactivity: <7.5 MET-hrs per week.

Blood draw time categories: ≤10 years and >10 years.

See eTable 1 for SDs.

Abbreviations: BCAAs, branched chain amino acids; BMI, body mass index; BP, blood pressure; CHD, coronary heart disease; CRP, C-reactive protein; eGFR, estimated glomerular filtration rate; GlycA, glycan biomarker of N-acetyl side chains of acute-phase proteins; HDL, high-density lipoprotein; ICAM-1, Intercellular adhesion molecule 1; LDL, low-density lipoprotein; LPIR, lipoprotein insulin resistance; MI, myocardial infarction; TRL, triglyceride-rich lipoprotein.



**eTable 3: Association of risk factors and biomarkers with incident CHD after additional adjustment for covariates\***

| Risk factor                            | Incident CHD at age <55                         | Incident CHD at 55≤ age <65 | Incident CHD at 65≤ age <75 | Incident CHD at age ≥75 | <i>P</i> <sub>interaction</sub> <sup>a</sup> (risk factor) × (age group) |
|----------------------------------------|-------------------------------------------------|-----------------------------|-----------------------------|-------------------------|--------------------------------------------------------------------------|
| <b>Clinical risk factors</b>           | Adjusted hazard ratio (95% CI)                  |                             |                             |                         |                                                                          |
| BMI, per SD increment                  | 1.24 (1.04 – 1.48)                              | 1.19 (1.09 – 1.29)          | 1.12 (1.04 – 1.21)          | 0.97 (0.88 – 1.08)      | .01                                                                      |
| BMI categories                         |                                                 |                             |                             |                         |                                                                          |
| Overweight                             | 1.68 (0.86 – 3.30)                              | 1.52 (1.18 – 1.95)          | 1.53 (1.27 – 1.84)          | 1.01 (0.81 – 1.25)      | .02                                                                      |
| Obese                                  | 2.63 (1.40 – 4.93)                              | 1.76 (1.36 – 2.29)          | 1.37 (1.10 – 1.70)          | 0.94 (0.72 – 1.24)      | .001                                                                     |
| Current smoker                         | 3.69 (2.16 – 6.29)                              | 3.03 (2.41 – 3.81)          | 2.04 (1.66 – 2.52)          | 2.03 (1.51 – 2.72)      | .02                                                                      |
| Diabetes                               | 6.58 (3.41 – 12.72)                             | 7.18 (5.49 – 9.38)          | 3.29 (2.51 – 4.31)          | 2.89 (2.05 – 4.08)      | <.001                                                                    |
| Diabetes <sup>b</sup>                  | 4.64 (2.21 – 9.73)                              | 6.59 (4.94 – 8.78)          | 3.25 (2.46 – 4.30)          | 2.95 (2.06 – 4.23)      | .001                                                                     |
| Metabolic syndrome                     | 4.01 (2.34 – 6.87)                              | 3.17 (2.51 – 3.99)          | 2.05 (1.70 – 2.47)          | 1.38 (1.12 – 1.70)      | <.001                                                                    |
| Hypertension                           | 3.74 (2.25 – 6.21)                              | 2.01 (1.62 – 2.49)          | 1.71 (1.45 – 2.03)          | 1.42 (1.17 – 1.72)      | .002                                                                     |
| Systolic BP, per SD increment          | 2.00 (1.62 – 2.48)                              | 1.41 (1.28 – 1.55)          | 1.30 (1.20 – 1.40)          | 1.14 (1.04 – 1.25)      | <.001                                                                    |
| Physical inactivity                    | 1.24 (0.74 – 2.07)                              | 1.26 (1.02 – 1.56)          | 1.17 (0.99 – 1.38)          | 1.03 (0.85 – 1.25)      | .52                                                                      |
| Parental MI <60 years                  | 1.79 (1.02 – 3.15)                              | 1.94 (1.54 – 2.45)          | 1.54 (1.26 – 1.89)          | 1.16 (0.87 – 1.56)      | .05                                                                      |
| <b>Lipids and lipoproteins</b>         | Adjusted hazard ratio (95% CI) per SD increment |                             |                             |                         |                                                                          |
| Total cholesterol                      | 1.26 (1.01 – 1.57)                              | 1.33 (1.22 – 1.45)          | 1.20 (1.11 – 1.29)          | 1.11 (1.02 – 1.22)      | .05                                                                      |
| LDL cholesterol                        | 1.25 (0.99 – 1.58)                              | 1.35 (1.23 – 1.48)          | 1.21 (1.12 – 1.30)          | 1.12 (1.02 – 1.23)      | .04                                                                      |
| HDL cholesterol                        | 0.50 (0.36 – 0.70)                              | 0.60 (0.53 – 0.69)          | 0.72 (0.65 – 0.79)          | 0.83 (0.75 – 0.92)      | <.001                                                                    |
| Total/HDL cholesterol ratio            | 1.92 (1.52 – 2.42)                              | 1.83 (1.65 – 2.01)          | 1.54 (1.42 – 1.67)          | 1.32 (1.20 – 1.46)      | <.001                                                                    |
| Triglycerides                          | 1.71 (1.38 – 2.12)                              | 1.48 (1.35 – 1.63)          | 1.39 (1.28 – 1.50)          | 1.19 (1.08 – 1.32)      | .002                                                                     |
| Trig/HDL cholesterol ratio             | 1.82 (1.47 – 2.25)                              | 1.58 (1.44 – 1.74)          | 1.45 (1.34 – 1.57)          | 1.24 (1.13 – 1.37)      | <.001                                                                    |
| Non-HDL cholesterol                    | 1.43 (1.16 – 1.76)                              | 1.47 (1.35 – 1.60)          | 1.30 (1.21 – 1.39)          | 1.18 (1.07 – 1.29)      | .004                                                                     |
| Apolipoprotein B                       | 1.56 (1.25 – 1.95)                              | 1.55 (1.42 – 1.68)          | 1.37 (1.27 – 1.47)          | 1.19 (1.08 – 1.31)      | .001                                                                     |
| Apolipoprotein A-I                     | 0.80 (0.59 – 1.08)                              | 0.70 (0.62 – 0.78)          | 0.84 (0.77 – 0.92)          | 0.92 (0.83 – 1.02)      | .002                                                                     |
| Lipoprotein (a)                        | 1.22 (0.92 – 1.60)                              | 1.29 (1.16 – 1.43)          | 1.13 (1.04 – 1.23)          | 1.09 (0.99 – 1.20)      | .12                                                                      |
| Total LDL particles <sup>c</sup>       | 1.60 (1.29 – 1.99)                              | 1.45 (1.32 – 1.59)          | 1.27 (1.18 – 1.37)          | 1.18 (1.07 – 1.30)      | .005                                                                     |
| Large LDL particles <sup>d</sup>       | 1.10 (0.80 – 1.52)                              | 1.07 (0.95 – 1.21)          | 1.04 (0.94 – 1.14)          | 1.13 (1.02 – 1.26)      | .68                                                                      |
| Medium LDL particles <sup>d</sup>      | 1.11 (0.80 – 1.56)                              | 1.12 (0.98 – 1.27)          | 1.07 (0.97 – 1.18)          | 0.99 (0.88 – 1.12)      | .59                                                                      |
| Small LDL particles <sup>d</sup>       | 1.97 (1.51 – 2.56)                              | 1.67 (1.49 – 1.87)          | 1.40 (1.28 – 1.54)          | 1.27 (1.12 – 1.43)      | <.001                                                                    |
| LDL particle average size <sup>c</sup> | 0.74 (0.59 – 0.94)                              | 0.83 (0.76 – 0.92)          | 0.88 (0.82 – 0.96)          | 0.96 (0.88 – 1.06)      | .08                                                                      |
| Total TRL particles                    | 1.55 (1.24 – 1.93)                              | 1.38 (1.26 – 1.52)          | 1.26 (1.17 – 1.35)          | 1.18 (1.08 – 1.29)      | .03                                                                      |
| Very large TRL particles               | 1.19 (1.06 – 1.33)                              | 1.07 (1.00 – 1.14)          | 1.09 (1.04 – 1.14)          | 1.02 (0.94 – 1.12)      | .23                                                                      |
| Large TRL particles                    | 1.41 (1.21 – 1.63)                              | 1.20 (1.11 – 1.31)          | 1.18 (1.10 – 1.26)          | 1.09 (1.00 – 1.20)      | .05                                                                      |
| Medium TRL particles                   | 1.40 (0.92 – 2.12)                              | 1.35 (1.14 – 1.61)          | 1.31 (1.14 – 1.49)          | 1.16 (1.00 – 1.35)      | .52                                                                      |
| Small TRL particles                    | 0.84 (0.73 – 0.97)                              | 1.01 (0.91 – 1.12)          | 1.03 (0.95 – 1.13)          | 1.20 (1.03 – 1.40)      | .03                                                                      |
| Very small TRL particles               | 1.52 (1.22 – 1.89)                              | 1.36 (1.24 – 1.49)          | 1.22 (1.13 – 1.31)          | 1.11 (1.01 – 1.22)      | .006                                                                     |
| TRL cholesterol                        | 1.41 (1.14 – 1.74)                              | 1.15 (1.04 – 1.26)          | 1.16 (1.08 – 1.25)          | 1.02 (0.93 – 1.13)      | .03                                                                      |
| TRL triglycerides                      | 1.55 (1.26 – 1.91)                              | 1.36 (1.24 – 1.49)          | 1.26 (1.17 – 1.36)          | 1.18 (1.08 – 1.29)      | .04                                                                      |
| TRL particle average size              | 1.77 (1.36 – 2.30)                              | 1.38 (1.24 – 1.54)          | 1.33 (1.22 – 1.45)          | 1.17 (1.05 – 1.29)      | .01                                                                      |
| Total HDL particles                    | 1.01 (0.77 – 1.33)                              | 0.85 (0.76 – 0.95)          | 0.93 (0.86 – 1.01)          | 0.93 (0.84 – 1.03)      | .49                                                                      |
| Large HDL particles                    | 0.78 (0.66 – 0.93)                              | 0.82 (0.77 – 0.87)          | 0.87 (0.82 – 0.92)          | 0.96 (0.87 – 1.06)      | .03                                                                      |
| Medium HDL particles                   | 0.76 (0.56 – 1.04)                              | 0.65 (0.57 – 0.74)          | 0.81 (0.74 – 0.88)          | 0.91 (0.82 – 1.01)      | <.001                                                                    |
| Small HDL particles                    | 1.43 (1.09 – 1.86)                              | 1.27 (1.14 – 1.41)          | 1.17 (1.08 – 1.27)          | 1.00 (0.90 – 1.10)      | .002                                                                     |
| HDL particle average size              | 0.61 (0.44 – 0.84)                              | 0.63 (0.56 – 0.72)          | 0.76 (0.69 – 0.83)          | 0.96 (0.87 – 1.06)      | <.001                                                                    |
| <b>Inflammatory</b>                    | Adjusted hazard ratio (95% CI) per SD increment |                             |                             |                         |                                                                          |
| CRP                                    | 1.46 (1.13 – 1.87)                              | 1.43 (1.28 – 1.60)          | 1.38 (1.26 – 1.52)          | 1.14 (1.02 – 1.27)      | .01                                                                      |
| Fibrinogen                             | 1.22 (0.98 – 1.52)                              | 1.32 (1.22 – 1.43)          | 1.16 (1.08 – 1.24)          | 1.07 (0.98 – 1.17)      | .003                                                                     |
| ICAM-1                                 | 1.24 (1.01 – 1.51)                              | 1.28 (1.18 – 1.38)          | 1.13 (1.05 – 1.22)          | 1.04 (0.95 – 1.15)      | .009                                                                     |

|                  |                                                 |                    |                    |                    |       |
|------------------|-------------------------------------------------|--------------------|--------------------|--------------------|-------|
| GlycA            | 1.51 (1.20 – 1.89)                              | 1.34 (1.21 – 1.48) | 1.24 (1.14 – 1.34) | 1.02 (0.92 – 1.12) | <.001 |
| <b>Metabolic</b> | Adjusted hazard ratio (95% CI) per SD increment |                    |                    |                    |       |
| Hemoglobin A1c   | 1.16 (1.04 – 1.28)                              | 1.14 (1.09 – 1.19) | 1.05 (1.00 – 1.11) | 0.97 (0.89 – 1.05) | <.001 |
| LPIR score       | 3.85 (1.97 – 7.53)                              | 1.91 (1.52 – 2.40) | 1.56 (1.32 – 1.84) | 1.04 (0.93 – 1.17) | <.001 |
| Homocysteine     | 0.96 (0.74 – 1.26)                              | 1.15 (1.04 – 1.26) | 1.08 (0.99 – 1.16) | 1.02 (0.93 – 1.13) | .33   |
| Citrate          | 0.93 (0.69 – 1.25)                              | 1.03 (0.93 – 1.14) | 0.99 (0.91 – 1.08) | 0.97 (0.88 – 1.08) | .85   |
| Total BCAAs      | 1.26 (1.02 – 1.57)                              | 1.19 (1.09 – 1.30) | 1.12 (1.04 – 1.20) | 0.99 (0.90 – 1.09) | .02   |
| Valine           | 1.25 (1.01 – 1.55)                              | 1.18 (1.07 – 1.29) | 1.11 (1.03 – 1.19) | 0.97 (0.88 – 1.07) | .01   |
| Leucine          | 1.15 (0.91 – 1.47)                              | 1.15 (1.04 – 1.26) | 1.07 (0.99 – 1.15) | 0.96 (0.87 – 1.06) | .06   |
| Isoleucine       | 1.34 (1.09 – 1.66)                              | 1.20 (1.09 – 1.31) | 1.16 (1.08 – 1.25) | 1.07 (0.98 – 1.18) | .16   |
| Alanine          | 1.02 (0.79 – 1.33)                              | 1.10 (0.99 – 1.22) | 1.11 (1.02 – 1.20) | 0.92 (0.83 – 1.02) | .03   |
| eGFR             | 1.26 (1.10 – 1.43)                              | 0.93 (0.83 – 1.04) | 0.91 (0.83 – 0.99) | 1.04 (0.96 – 1.14) | .003  |
| Creatinine       | 0.59 (0.44 – 0.80)                              | 1.03 (0.93 – 1.14) | 1.10 (1.02 – 1.18) | 0.96 (0.87 – 1.05) | <.001 |

\*HRs (95% CI) obtained from stratified Cox models (stratified on age groups and blood draw time categories) adjusted for model 1 covariates (baseline race, education categories, menopause, postmenopausal hormone use, randomized treatment assignment, and interactions between the risk factor of interest and age groups) plus additional covariates (physical activity, smoking, BMI, systolic blood pressure, diabetes, parental MI<60 years, and baseline treatment for hypertension or for high cholesterol).

<sup>a</sup>Likelihood Ratio Test (LRT, 3 d.f.) of the null hypothesis that the risk factor has the same effect across age groups.

An individual risk factor used as an exposure variable was not included as a covariate in that model.

<sup>b</sup> included model 1 covariates plus additional covariates plus LPIR score.

<sup>c</sup> included model 1 covariates plus additional covariates plus LDL particle concentration and LDL particle average size.

<sup>d</sup> included model 1 covariates plus additional covariates plus the other LDL subclasses (large, medium, or small LDL particles).

The following were log transformed: CRP, homocysteine, large HDL particles, lipoprotein (a), LPIR score, medium TRL particles, small TRL particles, total/HDL cholesterol ratio, triglycerides, trig/HDL cholesterol ratio, and TRL triglycerides.

BMI (kg/m<sup>2</sup>) categories: 25.0 - <30 (overweight); ≥30.0 (obese).

Physical inactivity: <7.5 MET-hours per week.

See eTable 1 for SDs.

Abbreviations: BCAAs, branched chain amino acids; BMI, body mass index; BP, blood pressure; CHD, coronary heart disease; CRP, C-reactive protein; eGFR, estimated glomerular filtration rate; GlycA, glycan biomarker of N-acetyl side chains of acute-phase proteins; HDL, high-density lipoprotein; ICAM-1, Intercellular adhesion molecule 1; LDL, low-density lipoprotein; LPIR, lipoprotein insulin resistance; MI, myocardial infarction; TRL, triglyceride-rich lipoprotein.

**eTable 4: Population-attributable risk analysis by age of CHD onset**

| Biomarker             | Incident CHD at age <55 | Incident CHD at 55≤ age <65 | Incident CHD at 65≤ age <75 | Incident CHD at age ≥75 |
|-----------------------|-------------------------|-----------------------------|-----------------------------|-------------------------|
| Overweight            |                         |                             |                             |                         |
| Prevalence            | 29.3%                   | 29.9%                       | 31.1%                       | 32.5%                   |
| PAR                   | 24.9%                   | 18.9%                       | 19.5%                       | 3.7%                    |
| Obese                 |                         |                             |                             |                         |
| Prevalence            | 18.5%                   | 18.1%                       | 17.2%                       | 15.7%                   |
| PAR                   | 38.1%                   | 24.2%                       | 16.4%                       | 4.8%                    |
| Current smoker        |                         |                             |                             |                         |
| Prevalence            | 12.4%                   | 11.9%                       | 10.5%                       | 8.7%                    |
| PAR                   | 26.6%                   | 18.9%                       | 8.5%                        | 7.1%                    |
| Diabetes              |                         |                             |                             |                         |
| Prevalence            | 2.1%                    | 2.2%                        | 2.5%                        | 2.8%                    |
| PAR                   | 17.1%                   | 18.1%                       | 8.0%                        | 6.5%                    |
| Metabolic syndrome    |                         |                             |                             |                         |
| Prevalence            | 22.3%                   | 23.0%                       | 24.3%                       | 26.5%                   |
| PAR                   | 53.1%                   | 44.2%                       | 30.6%                       | 17.3%                   |
| Hypertension          |                         |                             |                             |                         |
| Prevalence            | 19.1%                   | 21.2%                       | 26.0%                       | 33.6%                   |
| PAR                   | 40.6%                   | 22.7%                       | 21.6%                       | 17.7%                   |
| Parental MI <60 years |                         |                             |                             |                         |
| Prevalence            | 15.8%                   | 15.2%                       | 13.8%                       | 11.9%                   |
| PAR                   | 15.9%                   | 14.0%                       | 7.6%                        | 2.1%                    |
| Physical inactivity   |                         |                             |                             |                         |
| Prevalence            | 45.4%                   | 45.1%                       | 44.2%                       | 42.0%                   |
| PAR                   | 19.4%                   | 21.0%                       | 16.0%                       | 8.1%                    |

Population attributable risk was calculated using HRs (95% CI) from stratified Cox models (stratified on age groups and blood draw time categories), adjusted for model 1 covariates (baseline race, education categories, menopause, postmenopausal hormone use, randomized treatment assignment, and interactions between the risk factor of interest and age groups).

BMI (kg/m<sup>2</sup>) categories: 25.0 - <30 (overweight); ≥30.0 (obese).

Physical inactivity: <7.5 MET-hrs per week.

Abbreviations: CHD, coronary heart disease; MI, myocardial infarction; PAR, population-attributable risk.

**eTable 5: Baseline biomarker levels for CHD cases (by age of onset) and noncases**

|                                     | Incident CHD at age <55 years<br>N=63 | Incident CHD at 55≤ age <65<br>N=384 | Incident CHD at 65≤ age <75<br>N=654 | Incident CHD at age ≥75<br>N=447 | Noncases<br>N=26476         |
|-------------------------------------|---------------------------------------|--------------------------------------|--------------------------------------|----------------------------------|-----------------------------|
| <b>Lipid/lipoprotein biomarkers</b> |                                       |                                      |                                      |                                  |                             |
| Total cholesterol, mg/dL            | 220.0 (192.0 – 251.0)                 | 224.0 (199.0 – 252.0)                | 223.0 (196.0 – 250.0)                | 222.0 (198.0 – 250.0)            | 208.0 (183.0 – 235.0)       |
| LDL cholesterol, mg/dL              | 133.6 (108.0 – 150.4)                 | 133.3 (111.5 – 158.1)                | 132.4 (110.0 – 156.6)                | 132.1 (110.0 – 157.6)            | 120.9 (100.0 – 143.6)       |
| HDL cholesterol, mg/dL              | 41.0 (34.8 – 50.1)                    | 43.3 (35.7 – 52.5)                   | 45.9 (37.9 – 56.1)                   | 48.2 (39.7 – 60.0)               | 52.2 (43.5 – 62.6)          |
| Total/HDL cholesterol ratio         | 5.3 (4.4 – 6.6)                       | 5.2 (4.0 – 6.5)                      | 4.7 (3.9 – 5.9)                      | 4.4 (3.7 – 5.6)                  | 3.9 (3.2 – 4.9)             |
| Triglycerides, mg/dL                | 177.0 (125.0 – 299.0)                 | 163.0 (113.0 – 258.0)                | 162.0 (111.0 – 238.0)                | 147.0 (104.0 – 207.0)            | 117.0 (83.0 – 173.0)        |
| Trig/HDL cholesterol ratio          | 4.4 (2.6 – 8.4)                       | 3.8 (2.2 – 6.5)                      | 3.4 (2.2 – 5.8)                      | 2.9 (1.8 – 5.0)                  | 2.2 (1.4 – 3.7)             |
| Non-HDL cholesterol, mg/dL          | 174.3 (156.1 – 204.9)                 | 178.0 (148.9 – 207.9)                | 176.0 (147.5 – 200.8)                | 172.4 (144.4 – 197.2)            | 153.4 (128.4 – 180.8)       |
| Apolipoprotein B, mg/dL             | 1.2 (1.0 – 1.4)                       | 1.20 (1.0 – 1.4)                     | 1.2 (1.0 – 1.4)                      | 1.2 (1.0 – 1.4)                  | 1.0 (0.8 – 1.2)             |
| Apolipoprotein A-I, mg/dL           | 137.7 (121.7 – 155.7)                 | 135.3 (121.1 – 154.9)                | 143.7 (128.5 – 163.3)                | 148.9 (131.2 – 170.0)            | 149.2 (132.7 – 168.1)       |
| Lipoprotein (a), mg/dL              | 18.1 (4.5 – 67.8)                     | 14.7 (5.2 – 52.4)                    | 12.5 (4.7 – 51.6)                    | 12.2 (5.1 – 48.3)                | 10.5 (4.4 – 31.6)           |
| Total LDL particles, nmol/L         | 1851.9<br>(1559.2 – 2241.9)           | 1774.6<br>(1540.9 – 2091.5)          | 1760.2<br>(1470.0 – 2071.2)          | 1767.9<br>(1528.8 – 2022.3)      | 1557.6<br>(1321.8 – 1824.0) |
| Large LDL particles                 | 189.5 (2.5 – 343.4)                   | 192.5 (64.3 – 409.4)                 | 256.9 (84.8 – 433.6)                 | 294.2 (122.5 – 491.3)            | 308.5 (163.7 – 468.4)       |
| Medium LDL particles                | 0.0 (0.0 – 245.4)                     | 80.4 (0.0 – 268.4)                   | 73.0 (0.0 – 287.1)                   | 83.9 (0.0 – 289.0)               | 160.4 (0.4 – 350.0)         |
| Small LDL particles                 | 1592.0<br>(1050.1 – 1830.9)           | 1367.2<br>(898.7 – 1788.2)           | 1260.9<br>(851.1 – 1742.5)           | 1221.6<br>(846.5 – 1689.2)       | 940.2<br>(680.3 – 1313.4)   |
| LDL particle average size, nm       | 20.6 (20.2 – 21.0)                    | 20.7 (20.3 – 21.1)                   | 20.8 (20.4 – 21.1)                   | 20.9 (20.5 – 21.2)               | 20.9 (20.6 – 21.2)          |
| Total TRL particles, nmol/L         | 189.5 (159.8 – 241.3)                 | 189.9 (156.9 – 234.7)                | 190.7 (152.1 – 235.7)                | 193.1 (154.4 – 234.8)            | 165.2 (129.4 – 206.8)       |
| Very large TRL particles            | 0.2 (0.1 – 0.6)                       | 0.2 (0.1 – 0.4)                      | 0.2 (0.1 – 0.4)                      | 0.1 (0.1 – 0.3)                  | 0.1 (0.1 – 0.2)             |
| Large TRL particles                 | 3.8 (1.4 – 7.6)                       | 3.2 (0.9 – 6.1)                      | 3.0 (0.9 – 6.1)                      | 2.7 (0.6 – 5.2)                  | 1.5 (0.3 – 4.2)             |
| Medium TRL particles                | 22.9 (14.1 – 36.1)                    | 20.6 (13.2 – 33.0)                   | 20.1 (12.4 – 31.3)                   | 19.5 (10.7 – 29.0)               | 15.6 (8.4 – 25.2)           |
| Small TRL particles                 | 54.7 (34.1 – 92.0)                    | 59.0 (33.6 – 83.9)                   | 58.9 (36.3 – 87.2)                   | 59.9 (39.7 – 88.8)               | 55.2 (33.8 – 81.6)          |
| Very small TRL particles            | 100.8 (81.8 – 141.1)                  | 98.8 (75.5 – 134.5)                  | 98.4 (70.7 – 132.2)                  | 99.8 (71.9 – 134.2)              | 83.6 (58.2 – 113.8)         |
| TRL cholesterol, mg/dL              | 34.9 (27.9 – 43.3)                    | 33.1 (26.9 – 41.0)                   | 33.5 (26.3 – 41.1)                   | 32.9 (26.7 – 40.6)               | 28.6 (22.0 – 36.1)          |
| TRL triglycerides, mg/dL            | 123.0 (75.0 – 154.4)                  | 99.4 (72.7 – 146.4)                  | 103.2 (73.6 – 145.6)                 | 97.3 (68.7 – 137.7)              | 81.2 (55.3 – 116.6)         |
| TRL particle average size, nm       | 47.2 (40.7 – 55.2)                    | 45.1 (39.7 – 51.7)                   | 44.6 (40.4 – 51.4)                   | 43.5 (39.6 – 49.0)               | 42.4 (38.5 – 47.8)          |
| Total HDL particles, μmol/L         | 23.4 (21.3 – 26.3)                    | 23.3 (20.9 – 26.3)                   | 24.3 (22.0 – 26.8)                   | 24.6 (22.2 – 27.2)               | 24.4 (22.0 – 27.0)          |
| Large HDL particles                 | 1.4 (0.8 – 1.9)                       | 1.5 (1.0 – 2.3)                      | 1.6 (1.0 – 2.5)                      | 2.0 (1.3 – 3.1)                  | 2.1 (1.3 – 3.3)             |
| Medium HDL particles                | 4.4 (2.8 – 6.0)                       | 4.1 (2.4 – 6.2)                      | 4.5 (2.8 – 6.7)                      | 4.7 (2.9 – 6.6)                  | 5.4 (3.7 – 7.3)             |
| Small HDL particles                 | 17.5 (16.2 – 19.1)                    | 17.1 (15.3 – 19.5)                   | 17.5 (15.2 – 19.8)                   | 17.2 (14.8 – 19.5)               | 16.3 (14.1 – 18.6)          |
| HDL particle average size, nm       | 8.7 (8.5 – 8.9)                       | 8.7 (8.5 – 8.9)                      | 8.8 (8.6 – 9.0)                      | 8.8 (8.6 – 9.1)                  | 8.9 (8.7 – 9.2)             |
| <b>Inflammatory biomarkers</b>      |                                       |                                      |                                      |                                  |                             |
| CRP, mg/L                           | 3.1 (1.7 – 5.8)                       | 3.5 (1.5 – 7.4)                      | 3.5 (1.6 – 6.5)                      | 2.9 (1.2 – 5.3)                  | 2.0 (0.8 – 4.3)             |
| Fibrinogen, mg/dL                   | 375.6 (322.7 – 428.8)                 | 387.4 (330.3 – 453.7)                | 376.8 (323.4 – 432.4)                | 381.4 (331.9 – 433.1)            | 349.5 (306.7 – 400.8)       |

|                                     |                       |                       |                       |                       |                        |
|-------------------------------------|-----------------------|-----------------------|-----------------------|-----------------------|------------------------|
| ICAM-1, ng/mL                       | 383.7 (315.5 – 466.4) | 377.8 (328.1 – 450.3) | 371.6 (323.3 – 429.8) | 366.1 (330.3 – 420.9) | 341.3 (300.0 – 392.48) |
| GlycA, $\mu\text{mol/L}$            | 423.0 (387.0 – 485.0) | 418.0 (363.5 – 467.5) | 410.0 (369.0 – 462.0) | 396.0 (360.0 – 440.0) | 381.0 (338.0 – 428.0)  |
| <b>Metabolic biomarkers</b>         |                       |                       |                       |                       |                        |
| Hemoglobin A1c, %                   | 5.1 (4.9 – 5.4)       | 5.1 (4.9 – 5.6)       | 5.1 (4.9 – 5.3)       | 5.1 (4.9 – 5.3)       | 5.0 (4.8 – 5.2)        |
| LPIR score (0–100)                  | 65 (43 – 79)          | 58 (35 – 74)          | 55 (35 – 72)          | 49 (28 – 68)          | 39 (20 – 60)           |
| Homocysteine, $\mu\text{mol/L}$     | 10.3 (9.3 – 12.7)     | 11.2 (8.9 – 14.1)     | 11.0 (9.0 – 13.5)     | 11.2 (9.2 – 14.0)     | 10.4 (8.7 – 12.8)      |
| Citrate, $\mu\text{mol/L}$          | 91.1 (72.1 – 105.9)   | 95.1 (81.1 – 110.6)   | 96.6 (79.6 – 113.3)   | 98.5 (82.0 – 115.2)   | 93.7 (78.3 – 110.5)    |
| Total BCAAs, $\mu\text{mol/L}$      | 442.3 (370.9 – 529.7) | 430.6 (375.6 – 509.4) | 426.5 (368.0 – 490.6) | 413.0 (352.6 – 478.9) | 399.9 (349.3 – 459.2)  |
| Valine, $\mu\text{mol/L}$           | 246.2 (203.9 – 283.8) | 235.1 (205.6 – 270.9) | 230.0 (204.3 – 264.0) | 225.5 (193.8 – 259.8) | 219.4 (192.5 – 249.8)  |
| Leucine, $\mu\text{mol/L}$          | 132.8 (118.4 – 176.2) | 140.5 (115.6 – 175.7) | 136.2 (115.3 – 165.5) | 134.5 (110.2 – 158.4) | 131.2 (110.0 – 154.4)  |
| Isoleucine, $\mu\text{mol/L}$       | 61.8 (44.2 – 76.6)    | 58.4 (42.2 – 77.0)    | 55.5 (43.0 – 70.1)    | 51.6 (42.0 – 68.4)    | 50.2 (38.6 – 63.7)     |
| Alanine, $\mu\text{mol/L}$          | 414.2 (337.5 – 477.6) | 420.4 (359.1 – 505.9) | 420.8 (357.3 – 499.0) | 407.5 (335.6 – 476.0) | 402.1 (334.1 – 477.3)  |
| eGFR, mL/min per 1.73m <sup>2</sup> | 101.3 (89.4 – 131.6)  | 92.8 (81.0 – 105.2)   | 89.3 (76.6 – 104.1)   | 87.2 (73.5 – 103.5)   | 91.9 (79.7 – 105.5)    |
| Creatinine, mg/dL                   | 0.7 (0.5 – 0.7)       | 0.7 (0.6 – 0.8)       | 0.7 (0.6 – 0.8)       | 0.7 (0.6 – 0.8)       | 0.7 (0.6 – 0.8)        |

Data presented as median (interquartile range).

Non-cases were defined as participants free of CHD during follow-up.

SI conversion factors: To convert cholesterol to millimoles per liter, multiply by 0.0259; triglycerides to millimoles per liter, multiply by 0.0113; CRP to nanomoles per liter, multiply by 9.524; and creatinine to micromoles per liter, multiply by 88.42.

See eMethods 1 for biomarker measurement.

Abbreviations: BCAA, branched chain amino acids; CHD, coronary heart disease; CRP, C-reactive protein; eGFR, estimated glomerular filtration rate; GlycA, glycan biomarker of N-acetyl side chains of acute-phase proteins; HDL, high-density lipoprotein; ICAM-1, Intercellular adhesion molecule 1; LDL, low-density lipoprotein; LPIR, lipoprotein insulin resistance; TRL, triglyceride-rich lipoprotein.

**eTable 6: Characteristics of participants in each age group**

|                                            | <b>Age &lt;55</b> | <b>55≤ Age &lt;65</b> | <b>65≤ Age &lt;75</b> | <b>Age ≥75</b>  |
|--------------------------------------------|-------------------|-----------------------|-----------------------|-----------------|
| Age at time of entry into age group, years | 50.0 ± 2.6        | 56.4 ± 2.6            | 65.4 ± 1.4            | 75.1 ± 0.6      |
| <b>Baseline characteristics</b>            |                   |                       |                       |                 |
| Age, years                                 | 50.0 ± 2.6        | 53.0 ± 5.2            | 55.0 ± 6.9            | 60.9 ± 6.0      |
| Self-reported race/ethnicity               |                   |                       |                       |                 |
| White                                      | 15769 (95.0)      | 23457 (95.1)          | 23892 (95.5)          | 10797 (96.1)    |
| Black                                      | 316 (1.9)         | 479 (1.9)             | 438 (1.8)             | 179 (1.6)       |
| Hispanic                                   | 182 (1.1)         | 270 (1.1)             | 253 (1.0)             | 104 (0.9)       |
| Asian                                      | 260 (1.6)         | 360 (1.5)             | 325 (1.3)             | 120 (1.1)       |
| Other                                      | 81 (0.5)          | 111 (0.5)             | 100 (0.4)             | 36 (0.3)        |
| Education                                  |                   |                       |                       |                 |
| <4 years education                         | 8579 (52.2)       | 13356 (54.6)          | 13609 (54.9)          | 6612 (59.1)     |
| Bachelor's degree                          | 4222 (25.7)       | 5971 (24.4)           | 5945 (24.0)           | 2437 (21.8)     |
| Master's degree or<br>Doctorate            | 3630 (22.1)       | 5117 (20.9)           | 5227 (21.1)           | 2137 (19.1)     |
| Body mass index, kg/m <sup>2</sup>         | 26.0 ± 5.2        | 26.0 ± 5.0            | 25.9 ± 4.9            | 25.8 ± 4.6      |
| Current smoker                             | 2081 (12.4)       | 2948 (11.9)           | 2667 (10.6)           | 1015 (9.0)      |
| Diabetes                                   | 355 (2.1)         | 622 (2.5)             | 602 (2.4)             | 302 (2.7)       |
| Metabolic syndrome                         | 3722 (22.3)       | 5931 (23.9)           | 5963 (23.7)           | 2924 (25.8)     |
| Hypertension                               | 3343 (20.0)       | 5965 (24.0)           | 6543 (25.9)           | 3782 (33.3)     |
| Hypertension treatment                     | 1600 (9.6)        | 2992 (12.0)           | 3320 (13.2)           | 1984 (17.5)     |
| Systolic blood pressure, mm Hg             | 115 (115 – 125)   | 125 (115 – 135)       | 125 (115 – 135)       | 125 (115 – 135) |
| Physical inactivity                        | 7593 (45.4)       | 11232 (45.1)          | 11147 (44.2)          | 4816 (42.5)     |
| Parental MI<60 years                       | 2615 (15.8)       | 3638 (14.9)           | 3480 (14.0)           | 1373 (12.3)     |
| Postmenopausal                             | 5389 (32.3)       | 12171 (49.0)          | 14062 (55.9)          | 9420 (83.1)     |
| Postmenopausal HRT use                     | 3935 (23.5)       | 7652 (30.8)           | 8064 (32.0)           | 4747 (41.9)     |
| Cholesterol lowering treatment             | 295 (1.8)         | 671 (2.7)             | 800 (3.2)             | 537 (4.7)       |

Data presented as frequency (percentage) for categorical variables, mean ± standard deviation (for age, body mass index), and median (systolic blood pressure).

Baseline characteristics were determined at time of enrollment in WHS.

Percentages may not total 100 due to rounding. Participants could contribute to more than one age group as they passed through time until the occurrence of incident CHD or censoring (death or last follow-up).

Physical inactivity: <7.5 MET-hrs per week.

Abbreviations: HRT, hormone replacement therapy; MI, myocardial infarction.

**eTable 7: Types of incident CHD events by age of onset**

| Age group   | Outcome               |                                    |                                 |                              | Total |
|-------------|-----------------------|------------------------------------|---------------------------------|------------------------------|-------|
|             | Myocardial infarction | Percutaneous coronary intervention | Coronary artery bypass grafting | Coronary heart disease death |       |
| age <55     | 27                    | 20                                 | 16                              | 0                            | 63    |
| 55≤ age <65 | 135                   | 159                                | 76                              | 14                           | 384   |
| 65≤ age <75 | 245                   | 266                                | 118                             | 25                           | 654   |
| age ≥75     | 143                   | 122                                | 73                              | 109                          | 447   |

Outcomes may overlap within categories.  
Abbreviation: CHD, coronary heart disease.

## eReferences

1. Jeyarajah EJ, Cromwell WC, Otvos JD. Lipoprotein Particle Analysis by Nuclear Magnetic Resonance Spectroscopy. *Clin Lab Med*. 2006;26(4):847-870.
2. Tobias DK, Lawler PR, Harada PH, et al. Circulating Branched-Chain Amino Acids and Incident Cardiovascular Disease in a Prospective Cohort of US Women. *Circ Genomic Precis Med*. 2018;11(4):e002157.
3. Lawler PR, Akinkuolie AO, Chandler PD, et al. Circulating N-Linked Glycoprotein Acetyls and Longitudinal Mortality Risk. *Circ Res*. 2016;118(7):1106-1115.
4. Akinkuolie AO, Buring JE, Ridker PM, Mora S. A novel protein glycan biomarker and future cardiovascular disease events. *J Am Heart Assoc*. 2014;3(5):e001221.
5. Akinkuolie AO, Pradhan AD, Buring JE, Ridker PM, Mora S. Novel protein glycan side-chain biomarker and risk of incident type 2 diabetes mellitus. *Arterioscler Thromb Vasc Biol*. 2015;35(6):1544-1550.
6. Chandler PD, Akinkuolie AO, Tobias DK, et al. Association of N-Linked Glycoprotein Acetyls and Colorectal Cancer Incidence and Mortality. Zhou S, ed. *PLoS One*. 2016;11(11):e0165615.
7. Akinkuolie AO, Glynn RJ, Padmanabhan L, Ridker PM, Mora S. Circulating N-Linked Glycoprotein Side-Chain Biomarker, Rosuvastatin Therapy, and Incident Cardiovascular Disease: An Analysis From the JUPITER Trial. *J Am Heart Assoc*. 2016;5(7):e003822.
8. Dugani SB, Akinkuolie AO, Paynter N, Glynn RJ, Ridker PM, Mora S. Association of Lipoproteins, Insulin Resistance, and Rosuvastatin With Incident Type 2 Diabetes Mellitus. *JAMA Cardiol*. 2016;1(2):136.
9. Harada PHN, Demler O V, Dugani SB, et al. Lipoprotein insulin resistance score and risk of incident diabetes during extended follow-up of 20 years: The Women's Health Study. *J Clin Lipidol*. 2017;11(5):1257-1267.
10. Shalurova I, Connelly MA, Garvey WT, Otvos JD. Lipoprotein insulin resistance index: a lipoprotein particle-derived measure of insulin resistance. *Metab Syndr Relat Disord*. 2014;12(8):422-429.
